# Supplementary material for: Zeta-Carotene Isomerase (Z-ISO) Is Required for Light-Independent Carotenoid Biosynthesis in the Cyanobacterium Synechocystis sp. PCC 6803
Source: MDPI journal article supplement (doi:10.3390/microorganisms10091730), 2022-08-27
Supplement: s1 [file s1]

**Supplementary Information for: Proctor *et al.* Zeta-carotene isomerase (Z-ISO) is required for light-independent carotenoid biosynthesis in the cyanobacterium *Synechocystis* sp. PCC 6803**

**Table S1. Plasmids used in this study.**

| Plasmid name              | Details                                                                                                                                                                                                                                   | Source/reference <sup>1</sup>            |
|---------------------------|-------------------------------------------------------------------------------------------------------------------------------------------------------------------------------------------------------------------------------------------|------------------------------------------|
| pCDFDuet <sup>Tm</sup> -1 | Has two multiple cloning sites (MCS) for IPTG-inducible coexpression of two genes. AmpR.                                                                                                                                                  | Novagen                                  |
| pAC-ZETAipi               | Contains <i>crtE</i> , <i>crtB</i> , and <i>idi</i> genes of <i>Erwinia herbicola</i> (Pantoea agglomerans) Eho10, and <i>pds</i> ( <i>crtP</i> ) gene of <i>Synechococcus</i> PCC 7942 to produce zeta-carotene in <i>E. coli</i> . CmR. | Addgene; Cunningham and Gantt, 2007 [27] |
| pPD-NFLAG                 | Genes cloned into NotI/BglII sites are preceded by sequence encoding N-terminal 3xFLAG tag. Integrates into <i>Synechocystis</i> genome at <i>psbAII</i> locus. KanR.                                                                     | Hollingshead et al. 2012 [32]            |
| pPD-CFLAG                 | Genes cloned into NdeI/NheI sites are followed by sequence encoding C-terminal 3xFLAG tag. Integrates into <i>Synechocystis</i> genome at <i>psbAII</i> locus. KanR.                                                                      | Chidgey et al. 2014 [34]                 |
| pET21a(+)                 | Plasmid for IPTG inducible gene expression. AmpR.                                                                                                                                                                                         | Novagen                                  |
| pMAL-c5x                  | Allows inducible cytoplasmic expression of maltose-binding protein (MBP) fusions with a Factor Xa cleavage site. AmpR.                                                                                                                    | New England Biolabs                      |
| pMAL-p5x                  | Allows inducible periplasmic expression of maltose-binding protein (MBP) fusions with a Factor Xa cleavage site. AmpR.                                                                                                                    | New England Biolabs                      |
| pAH592                    | slr1599 inserted at MCS2 of pCDFDuet <sup>Tm</sup> -1.                                                                                                                                                                                    | This study                               |
| pAH595                    | Maize Z-ISO inserted at MCS2 of pCDFDuet <sup>Tm</sup> -1.                                                                                                                                                                                | This study                               |
| pAH585                    | <i>Synechocystis</i> <i>zds</i> ( <i>crtQ</i> ; <i>slr0940</i> ) inserted at MCS1 of pCDFDuet <sup>Tm</sup> -1.                                                                                                                           | This study                               |
| pAH587                    | slr1599 inserted at MCS2 of pAH585.                                                                                                                                                                                                       | This study                               |
| pAH590                    | Maize Z-ISO inserted at MCS2 of pAH585.                                                                                                                                                                                                   | This study                               |
| pAH445                    | Slr1599 inserted into NotI/BglII sites of pPD-NFLAG                                                                                                                                                                                       | This study                               |
| pAH436                    | <i>Arabidopsis</i> Z-ISO gene (At1g10830) lacking the first 174 bp (the sequence encoding the N-terminal chloroplast transit peptide) and with the sequence encoding a Ser-Ala linker                                                     | This study                               |

|        |                                                                                                           |            |
|--------|-----------------------------------------------------------------------------------------------------------|------------|
|        | followed by the Strep-tag® II added to the 3' end of the gene inserted into NdeI/BglII sites of pPD-NFLAG |            |
| pAH545 | Codon optimized His-MBP- <i>ZmZ-ISO</i> construct inserted into pET21a(+)                                 | This study |
| pAH546 | As pAH545 but with the <i>ZmZ-ISO</i> replaced by slr599.                                                 | This study |
| pAH565 | As pAH546 but with <i>ynhF</i> inserted upstream of slr1599.                                              | This study |
| pAH424 | slr1599 inserted into pMAL-c5x                                                                            | This study |
| pAH707 | slr1599 inserted into pMAL-p5x                                                                            | This study |

---

<sup>1</sup>See main paper for references.

**Table S2. Primers used in this study.** Restriction sites are shown bold italics, mismatches in QuikChange primers are underlined and homology regions for OLE-PCR are underlined and bold.

| Primer | Sequence (5' → 3')                                               | Details                                                                                       |
|--------|------------------------------------------------------------------|-----------------------------------------------------------------------------------------------|
| AH1203 | AAGCCT <b><i>CATATG</i></b> TTGTTTGATATTTCTTCTCCTTGGC            | Primer pair for slr1599 into pCDFDuet MCS2 (NdeI/XhoI)                                        |
| AH1206 | AGCAAT <b><i>CTCGAG</i></b> CTACCAATTAAGTCTGGAGGTC               |                                                                                               |
| AH1207 | AAGCCT <b><i>CCATGG</i></b> GGCGTGTTGCAATTGTGGGAG                | Primer pair for <i>SynZDS</i> into pCDFDuet MCS1 (NcoI/SalI)                                  |
| AH1208 | AGCAAT <b><i>GTCGACT</i></b> TACTGAGATGCCAGGACTG                 |                                                                                               |
| AH912  | TAGAACCAACGATTGACCAATTCAC                                        | Primers for generation of slr1599 deletion construct by OLE-PCR (912/913 UsF and 914/915 DsF) |
| AH913  | <b><u>CTGCAATCGGATGCGATTATTGAATA</u></b> AATGGCAAACAACAGAAGGTAGG |                                                                                               |
| AH914  | <b><u>GCATCCCTTAACCTGTTTTTCGTGTG</u></b> TGGGGGTAATGGGTTTCATTGC  |                                                                                               |
| AH915  | TTGCATTGTTGCAGGGCTTGG                                            |                                                                                               |
| AH595  | TATTCAATAATCGCATCCGATTGCAG                                       | Primer pair for erythromycin resistance cassette                                              |
| AH596  | CACACGAAAAACAAGTTAAGGGATGC                                       |                                                                                               |
| AH955  | AAGCCT <b><i>GCGGCCGC</i></b> CATTTGATATTTCTTCTCCTTGGC           | Primer pair for <i>SynZ</i> -ISO into pPD-NFLAG (NotI/BglII)                                  |
| AH956  | AGCAAT <b><i>AGATCT</i></b> CTACCAATTAAGTCTGGAGGTCATC            |                                                                                               |
| AH957  | AAGCCT <b><i>CATATG</i></b> TTTGATATTTCTTCTCCTTGGC               | Primer pair for <i>SynZ</i> -ISO into pPD-CFLAG (NdeI/NheI)                                   |
| AH958  | AGCAAT <b><i>GCTAGC</i></b> CAATTAAGTCTGGAGGTCATCAC              |                                                                                               |
| AH198  | GGTATATGGATCATAATTGTATGCCCCG                                     | Primer pair to amplify <i>psbAII</i> region from pPD-N/CFLAG                                  |
| AH199  | CTATTCAATCGCTCTAGGCGATCG                                         |                                                                                               |
| AH47   | AAACGCCCTCTGTTTACCCA                                             | Primer pair for screening segregation of the <i>psbAII</i> locus                              |
| AH48   | TCAACCCGGTACAGAGCTTC                                             |                                                                                               |
| AH959  | TTCTGTTGTTTGCCATCGTT <b><u>GCT</u></b> AGTGGCTTAGCCGCCCTGC       | Primer pair for slr1599 H29A mutation                                                         |
| AH960  | AGGGCGGCTAAGCCACTAG <b><u>CA</u></b> ACGATGGCAAACAACAGAAGG       |                                                                                               |
| AH961  | TCGGTCAAGTAATTTGGT <b><u>C</u></b> CATTGCCACACCCTCTGG            | Primer pair for slr1599 C142S mutation                                                        |
| AH962  | ACCAGAGGGTGTGGGCAAT <b><u>G</u></b> ACCAAATTACTTGACCGACC         |                                                                                               |
| AH963  | AGTAATTTGGTGCATTGCC <b><u>GC</u></b> CACCCTCTGGTTGGGAACC         | Primer pair for slr1599 H145A mutation                                                        |
| AH964  | TGGTTCCAACAGAGGGT <b><u>GCG</u></b> GCAATGCACCAAATTACTTGACC      |                                                                                               |
| AH965  | TTTGAGTCTGGCATGGCG <b><u>CT</u></b> CGCCGTTGGCAACACAAATATG       | Primer pair for slr1599 D173A mutation                                                        |
| AH966  | TTGTGTTGCCAACGGCG <b><u>AG</u></b> CGCCATGCCAGACTGCAAAGC         |                                                                                               |
| MP487  | TGACTTTGGGCGCATATTTGCT <b><u>GCC</u></b> CTTATGCAGG              | Primer pair for MBP-ZmZ-ISO H354A                                                             |
| MP488  | CCTGCATAAGAGGG <b><u>G</u></b> CAGCGAAATATGCGCCCAAAGTCA          |                                                                                               |
| MP489  | CTTTGGGCGCATATTTGCT <b><u>TGG</u></b> CCTTATGCAGGCTC             | Primer pair for MBP-ZmZ-ISO H354W                                                             |
| MP490  | GAGGCCTGCATAAGAG <b><u>GCA</u></b> AGCGAAATATGCGCCCAAAG          |                                                                                               |

|       |                                                 |                                                        |
|-------|-------------------------------------------------|--------------------------------------------------------|
| MP491 | CGTAGGGGAACGGGTGTAT <u>GCC</u> GTGCTGTTC        | Primer pair for MBP-ZmZ-ISO<br>R170A                   |
| MP492 | GAACAGCAC <u>GGC</u> CATACACCCGTTCCCCTACG       |                                                        |
| MP493 | GGGGAACGGGTGTAT <u>IGG</u> GTGCTGTTGCTG         | Primer pair for MBP-ZmZ-ISO<br>R170W                   |
| MP494 | CAGCGAACAGCAC <u>CCA</u> ATACACCCGTTCCCC        |                                                        |
| AH923 | AAGCCT <b>CATATG</b> TTTGATATTTCTCTCCTTGGC      | Primer pair for slr1599 into<br>pMAL-c/p5X (NdeI/Sall) |
| AH924 | AGCAAT <b>GTCGAC</b> CTACCAATTAACCTCTGGAGGTCATC |                                                        |

**Table S3. Sequences of MBP-Z-ISO fusion genes used in this study.**

| Name and sequence                                                                                                                                                                                                                                                                                                                                                                                                                                                                                                                                                                                                                                                                                                                                                                                                                                                                                                                                                                                                                                                                                                                                                                                                                                                                                                                                                                                                                                                                                                                                                                                                                                                                                                                                                                                                                                                                                                                                                                                                                                                                                                                                                                                                                                                                                                                                                                                                                                                                                                                     | Key                                                                                                                                                                                                                                                                 |
|---------------------------------------------------------------------------------------------------------------------------------------------------------------------------------------------------------------------------------------------------------------------------------------------------------------------------------------------------------------------------------------------------------------------------------------------------------------------------------------------------------------------------------------------------------------------------------------------------------------------------------------------------------------------------------------------------------------------------------------------------------------------------------------------------------------------------------------------------------------------------------------------------------------------------------------------------------------------------------------------------------------------------------------------------------------------------------------------------------------------------------------------------------------------------------------------------------------------------------------------------------------------------------------------------------------------------------------------------------------------------------------------------------------------------------------------------------------------------------------------------------------------------------------------------------------------------------------------------------------------------------------------------------------------------------------------------------------------------------------------------------------------------------------------------------------------------------------------------------------------------------------------------------------------------------------------------------------------------------------------------------------------------------------------------------------------------------------------------------------------------------------------------------------------------------------------------------------------------------------------------------------------------------------------------------------------------------------------------------------------------------------------------------------------------------------------------------------------------------------------------------------------------------------|---------------------------------------------------------------------------------------------------------------------------------------------------------------------------------------------------------------------------------------------------------------------|
| <p><b>MBP-Maize Z-ISO fusion:</b></p> <p>ATG<b>CATCACCACCATCATCATCACCATCATCAT</b>tcttctggtgtagatctgggtaccA<br/> AAATCGAAGAAGGTAAACTGGTAATCTGGATTAAACGGCGATAAAGGCTATAACGGTCT<br/> CGCTGAAGTCGGTAAGAAATTCGAGAAAGATACCGGAATTAAAGTCACCGTTGAGCAT<br/> CCGGATAAACTGGAAGAGAAATTCACAGGTTGCGGCAACTGGCGATGGCCCTGACA<br/> TTATCTTCTGGGCACACGACCGCTTTGGTGGCTACGCTCAATCTGGCCTGTTGGCTGA<br/> AATCACCCTCGACAAAGCGTTCCAGGACAAGCTGTATCCGTTTACCTGGGATGCCGTA<br/> CGTTACAACGGCAAGCTGATTGCTTACCCGATCGCTGTTGAAGCGTTATCGCTGATTT<br/> ATAACAAAGATCTGCTGCCGAACCCGCCAAAAACCTGGGAAGAGATCCCGGCGCTGGA<br/> TAAAGAACTGAAAGCGAAAGGTAAGAGCGCGCTGATGTTCAACCTGCAAGAACCGTAC<br/> TTCACCTGGCCGCTGATTGCTGCTGACGGGGGTTATGCGTTCAAGTATGAAAACGGCA<br/> AGTAGCAGATTAAAGACGTGGGCGTGGATAACGCTGGCGCGAAAGCGGGTCTGACCTT<br/> CCTGGTTGACCTGATTAAAAACAAACACATGAATGCAGACACCGATTACTCCATCGCA<br/> GAAGCTGCCCTTTAATAAAGGCGAAACAGCGATGACCATCAACGGCCCGTGGGCATGGT<br/> CCAACATCGACACCAGCAAAGTGAATTATGGTGTAAACGGTACTGCCGACCTTCAAGGG<br/> TCAACCATCCAAACCGTTCGTTGGCGTGCTGAGCGCAGGTATTAACGCCGCCAGTCCG<br/> AACAAAGAGCTGGCAAAAGAGTTCTCGAAAACCTATCTGCTGACTGATGAAGGTCTGG<br/> AAGCGGTTAATAAAGACAAACCGCTGGGTGCCGTAGCGCTGAAGTCTTACGAGGAAGA<br/> GTTGGCGAAAGATCCACGTATTGCCGCCACCATGGAACGCCAGAAAGGTGAAATC<br/> ATGCCGAACATCCCGCAGATGTCCGCTTTCTGGTATGCCGTGCGTACTGCGGTGATCA<br/> ACGCCGCCAGCGGTCGTGACTGTGATGAAGCCCTGAAAGACGCGCAGACTgatta<br/> cgatatcccaggtagacc<b>GAGAACCTGTACTTCCAATCC</b>aatgccatgCGTCCGGCGCGT<br/> GCGGTGGGCGGCGGCATTGAACCGAAAGAAGGCGTGGTGGCGGAAGGCGATGAAAGCG<br/> GCGGCGGCGCGGTGCTGGTGGGCGAAGATAGCGCGGCGTTTGAACGAAAGATCAGAG<br/> CGTGGCGAGCTGGGCGTATTTTTCGGGCATTCTGGGCGCGGTGCTGGTGGCGCTGAAC<br/> GTGCTGTGGATTGATCCGAGCACCGGCGTGGGCACCAAATTTCTGGATGCGGTGGCGA<br/> GCGTGAGCGATAGCCATGAAGTGGTGTGCTGCTGCTGACCATTTATTTTTCGGGTGGT<br/> GCATAGCGGCATGGCGAGCCTGCGTGAAAGCGGCGAAAAAATTGTGGGCGAACGTGTG<br/> TATCGTGTGCTGTTTTCGGGCATTAGCCTGCCGCTGGCGGTGACCACCATTTGTGTATT<br/> TTATTAACCATCGTTATGATGGCACCCAGCTGTGGCAGGTGCAGGGCATTACCGGCAT<br/> TCATGAACCTGCTGTGGTTTAGCAGCTTTATTAGCTTTTTTTTTCTGTATCCGAGCACC<br/> TTTAACCTGCTGGAAGTGGCGGCGGTGGATAAACCGAAACTGCACATGTGGGAAACCG<br/> GCATTATGCGTATTACCCGTCATCCGAGATGGTGGGCCAGGTGATTGGTGCCTGGC<br/> GCATACCCTGTGGATTGGCAATAGCGTGGCGGTGGCGGCGAGCGTGGGCCCTGATTAGC<br/> CATCATCTGTTTGGCGCGTGGAAACGGCGATCGTCTGCTGAGCCGTTATGGCGAAG<br/> CGTTTGAAGTGTGAAAAAACGTACACGCGTATGCCGTTTTCGGCGGATTATTGATGG<br/> CCGTCAGAAACTGCCGAAAGATTATCATAAAGAATTTTTCTGCTGCCGTATGTGGCG<br/> ATTACCATGCTGACCCTGGGCGCGTATTTTTCGCATCCGCTGATGCAGGCGAGCAGCT<br/> ATCAGCTGCCGTGGTAA</p> | <p>Construct encodes following protein:</p> <p>His<sub>10</sub>-tag-linker-<br/> MBP-linker-TEV<br/> cleavage site-linker-<br/> ZmZ-ISO*</p> <p>*starting at Arg49 codon and codon optimized for <i>E. coli</i> B strain using Integrated DNA Technologies tool</p> |
| <p><b>MBP-Synechocystis Z-ISO fusion version 1:</b></p> <p>ATG<b>CATCACCACCATCATCATCACCATCATCAT</b>tcttctggtgtagatctgggtaccA<br/> AAATCGAAGAAGGTAAACTGGTAATCTGGATTAAACGGCGATAAAGGCTATAACGGTCT<br/> CGCTGAAGTCGGTAAGAAATTCGAGAAAGATACCGGAATTAAAGTCACCGTTGAGCAT<br/> CCGGATAAACTGGAAGAGAAATTCACAGGTTGCGGCAACTGGCGATGGCCCTGACA<br/> TTATCTTCTGGGCACACGACCGCTTTGGTGGCTACGCTCAATCTGGCCTGTTGGCTGA<br/> AATCACCCTCGACAAAGCGTTCCAGGACAAGCTGTATCCGTTTACCTGGGATGCCGTA<br/> CGTTACAACGGCAAGCTGATTGCTTACCCGATCGCTGTTGAAGCGTTATCGCTGATTT<br/> ATAACAAAGATCTGCTGCCGAACCCGCCAAAAACCTGGGAAGAGATCCCGGCGCTGGA<br/> TAAAGAACTGAAAGCGAAAGGTAAGAGCGCGCTGATGTTCAACCTGCAAGAACCGTAC<br/> TTCACCTGGCCGCTGATTGCTGCTGACGGGGGTTATGCGTTCAAGTATGAAAACGGCA<br/> AGTACGACATTAAAGACGTGGGCGTGGATAACGCTGGCGCGAAAGCGGGTCTGACCTT</p>                                                                                                                                                                                                                                                                                                                                                                                                                                                                                                                                                                                                                                                                                                                                                                                                                                                                                                                                                                                                                                                                                                                                                                                                                                                                                                                                                                                                                                                                                                                                                                                                                                                                                                                                       | <p>Construct encodes following protein:</p> <p>His<sub>10</sub>-tag-linker-<br/> MBP-linker-TEV<br/> cleavage site-linker-<br/> Slr1599</p>                                                                                                                         |

|                                                                                                                                                                                                                                                                                                                                                                                                                                                                                                                                                                                                                                                                                                                                                                                                                                                                                                                                                                                                                                                                                                                                                                                                                                                                                                                                                                                                                                                                                                                                                                                                                                                                                                                                                                                                                                                                                                                                                                                                                                                                                                                                                                                                        |                                                                                                                                                     |
|--------------------------------------------------------------------------------------------------------------------------------------------------------------------------------------------------------------------------------------------------------------------------------------------------------------------------------------------------------------------------------------------------------------------------------------------------------------------------------------------------------------------------------------------------------------------------------------------------------------------------------------------------------------------------------------------------------------------------------------------------------------------------------------------------------------------------------------------------------------------------------------------------------------------------------------------------------------------------------------------------------------------------------------------------------------------------------------------------------------------------------------------------------------------------------------------------------------------------------------------------------------------------------------------------------------------------------------------------------------------------------------------------------------------------------------------------------------------------------------------------------------------------------------------------------------------------------------------------------------------------------------------------------------------------------------------------------------------------------------------------------------------------------------------------------------------------------------------------------------------------------------------------------------------------------------------------------------------------------------------------------------------------------------------------------------------------------------------------------------------------------------------------------------------------------------------------------|-----------------------------------------------------------------------------------------------------------------------------------------------------|
| <p>CCTGGTTGACCTGATTAAAAACAAACACATGAATGCAGACACCGATTACTCCATCGCA<br/> GAAGCTGCCCTTAATAAAGGCGAAACAGCGATGACCATCAACGGCCCGTGGGCATGGT<br/> CCAACATCGACACCAGCAAAGTGAATTATGGTGTAAACGGTACTGCCGACCTTCAAGGG<br/> TCAACCATCCAAACCGTTCGTTGGCGTGCTGAGCGCAGGTATTAACGCCGCCAGTCCG<br/> AACAAAGAGCTGGCAAAAGAGTTCCTCGAAAACTATCTGCTGACTGATGAAGGTCTGG<br/> AAGCGGTTAATAAAGACAAACCGCTGGGTGCCGTAGCGCTGAAGTCTTACGAGGAAGA<br/> GTTGGCGAAAGATCCACGTATTGCCGCCACCATGGAAAACGCCCAGAAAGGTGAAATC<br/> ATGCCGAACATCCCGCAGATGTCCGCTTTCTGGTATGCCGTGCGTACTGCGGTGATCA<br/> ACGCCGCCAGCGGTCGTCAGACTGTGATGAAGCCCTGAAAGACGCGCAGACTgatta<br/> cgatatcccagggtaccGAGAACCTGTACTTCCAATCCaatgccatgAATTGTCTCGCG<br/> CTGTTTGACATCTCTTCCCCGTGGCCATGGTTAACTCCATCTCATGGTATTATTGCTG<br/> CCTATCTGCTGTTGTTTGGCATTGTTCACTCGGGGCTGGCTGCCCTTACGTGCGTGGGG<br/> TGAATCCAAAATCGGTGCCCCGTGGGTATCGTGTAATTTTTGCACTGGTGAGTATCCCA<br/> TTAGCAACTGGTCTTATTATTTATTTCTTCAATCACCGTTATGACGGTTTACAGTTAT<br/> GGCAAGTACAGGGCGTAACAGGGGTAAAGCCTTTAGTATGGATTCTCAGCGCTTTGAG<br/> TTTTTTCTTCTTTTCCCGGCGACGTTTAACTCTGTTAGAGATCGCTGCAATCCAGAAG<br/> CCAGAGATCCATCTTTACGAAACCGGTATTATTCTGTATCTGCCGGCATCCGCAAATGG<br/> TCGGGCAAGTCATCTGGTGCATTGCACATACGCTTTGGCTTGGCACTACGTTTACGCT<br/> GGTAACGTCCCTCGGCCTCATTGCCCATATTGCTTCGCAGTCTGGCACGGGGATCGG<br/> CGGTGGCAACACAAATATGGCGAAGCCTTTCTCGCCGTAAAGCAACGCACGAGCATT<br/> TTCTTTTCAAGCCATTTGGGAAGGCCGTGAGATCCTTGTTTGGCAAGAGTTTATTAA<br/> GCCAGCGTATGTGCGCGTTATGGGTTTATCGCCTTGTTATGGTGGGGGCATCCATGG<br/> TTAATGGTCATGACATCACGGGTAAATTGGTAG</p>                                                                                                                                                                                                                                                                                                                                                                                                                                                                                                                                                                                                                                                                                               |                                                                                                                                                     |
| <p><b>MBP-Synechocystis Z-ISO fusion version 2 (plus YhnF):</b></p> <p>ATGCATCACCACCATCATCATCACCATCATCATtcttctgggtgtagatctgggtaccA<br/> AAATCGAAGAAGGTAAACTGGTAATCTGGATTAACGGCGATAAAGGCTATAACGGTCT<br/> CGCTGAAGTCGGTAAGAAATTTCGAGAAAGATACCGGAATTAAGTCAACGTTGAGCAT<br/> CCGGATAAACTGGAAGAGAAATTCCACAGGTTGCGGCAACTGGCGATGGCCCTGACA<br/> TTATCTTCTGGGCACACGACCGCTTTGGTGGCTACGCTCAATCTGGCCTGTTGGCTGA<br/> AATCACCCCGGACAAAGCGTTCCAGGACAAGCTGTATCCGTTTACCTGGGATGCCGTA<br/> CGTTACAACGGCAAGCTGATTGCTTACCCGATCGCTGTTGAAGCGTTATCGCTGATTT<br/> ATAACAAAGATCTGCTGCCGAACCCGCCAAAAACCTGGGAAGAGATCCCGGCGCTGGA<br/> TAAAGAACTGAAAGCGAAAGGTAAGAGCGCGCTGATGTTCAACCTGCAAGAACCCTAC<br/> TTCACCTGGCCGCTGATTGCTGCTGACGGGGGTTATGCGTTCAAGTATGAAAACGGCA<br/> AGTACGACATTAAAGACGTGGGCGTGGATAACGCTGGCGCGAAAGCGGGTCTGACCTT<br/> CCTGGTTGACCTGATTAAAAACAAACACATGAATGCAGACACCGATTACTCCATCGCA<br/> GAAGCTGCCTTTAATAAAGGCGAAACAGCGATGACCATCAACGGCCCGTGGGCATGGT<br/> CCAACATCGACACCAGCAAAAGTGAATTATGGTGTAAACGGTACTGCCGACCTTCAAGGG<br/> TCAACCATCCAAACCGTTCGTTGGCGTGCTGAGCGCAGGTATTAACGCCGCCAGTCCG<br/> AACAAAGAGCTGGCAAAAGAGTTCCTCGAAAACTATCTGCTGACTGATGAAGGTCTGG<br/> AAGCGGTTAATAAAGACAAACCGCTGGGTGCCGTAGCGCTGAAGTCTTACGAGGAAGA<br/> GTTGGCGAAAGATCCACGTATTGCCGCCACCATGGAAAACGCCCAGAAAGGTGAAATC<br/> ATGCCGAACATCCCGCAGATGTCCGCTTTCTGGTATGCCGTGCGTACTGCGGTGATCA<br/> ACGCCGCCAGCGGTCGTCAGACTGTGATGAAGCCCTGAAAGACGCGCAGACTgatta<br/> cgatatcccagggtaccGAGAACCTGTACTTCCAATCCaatgccatgATGTCCACGGAT<br/> TTAAAAATTTTCACTGGTAACAACGATTATCGTCCTCGGTTTGATCGTAGCCGTGGGTT<br/> TGACTGCCGCGCTGCACAATTGTCTCGCGCTGTTTGACATCTCTTCCCCGTGGCCATG<br/> GTTAACTCCATCTCATGGTATTATTGCTGCCTATCTGCTGTTGTTTGGCATTGTTTAC<br/> TCGGGGCTGGCTCCTTACGTGCGTGGGGTGAATCCAAAATCGGTGCCCGTGGGTATC<br/> GTGTAATTTTTTGCACTGGTGAGTATCCCATAGCAACTGGTCTTATTATTTATTTCTT<br/> CAATCACCGTTATGACGGTTTACAGTTATGGCAAGTACAGGGCGTAACAGGGGTAAAG<br/> CCTTTAGTATGGATTCTCAGCGCTTTGAGTTTTTTCTTCTTTTCCCGGCGACGTTTA<br/> ATCTGTTAGAGATCGCTGCAATCCAGAAGCCAGAGATCCATCTTTACGAAACCGGTAT<br/> TATTCGTATCTGCCGGCATCCGCAAATGGTCGGGCAAGTCATCTGGTGCATTGCACAT<br/> ACGCTTTGGCTTGGCACTACGTTTACGCTGGTAACGTCCCTCGGCCCTATTGCCCATC<br/> ATTGCTTCGCAGTCTGGCACGGGGATCGGCGGTGGCAACACAAATATGGCGAAGCCTT</p> | <p>Construct encodes<br/> following protein:<br/> His<sub>10</sub>-tag-linker-<br/> MBP-linker-TEV<br/> cleavage site-linker-<br/> YhnF-Slr1599</p> |

|                                                                                                                                                                                                                                                                                                                                                                                                                                                                                                                                                                                                                                                                                                                                                                                                                                                                                                                                                                                                                                                                                                                                                                                                                                                                                                                                                                                                                                                                                                                                                                                                                                                                                                                                                                                                                                                                                                                                                                                                                                                                                                                                                                                                                |                                                                                                                                                                    |
|----------------------------------------------------------------------------------------------------------------------------------------------------------------------------------------------------------------------------------------------------------------------------------------------------------------------------------------------------------------------------------------------------------------------------------------------------------------------------------------------------------------------------------------------------------------------------------------------------------------------------------------------------------------------------------------------------------------------------------------------------------------------------------------------------------------------------------------------------------------------------------------------------------------------------------------------------------------------------------------------------------------------------------------------------------------------------------------------------------------------------------------------------------------------------------------------------------------------------------------------------------------------------------------------------------------------------------------------------------------------------------------------------------------------------------------------------------------------------------------------------------------------------------------------------------------------------------------------------------------------------------------------------------------------------------------------------------------------------------------------------------------------------------------------------------------------------------------------------------------------------------------------------------------------------------------------------------------------------------------------------------------------------------------------------------------------------------------------------------------------------------------------------------------------------------------------------------------|--------------------------------------------------------------------------------------------------------------------------------------------------------------------|
| <p>TCTCGCCGTAAAGCAACGCACGAGCATTATTCCTTTTCAAGCCATTTGGGAAGGCCGT<br/>CAGATCCTTGTGTTGGCAAGAGTTTATTAAGCCAGCGTATGTCGGCGTTATGGGTTTAA<br/>TCGCCCTTGTATGGTGGGGGCATCCATGGTTAATGGTCATGACATCACGGGTAAATTG<br/>GTAG</p>                                                                                                                                                                                                                                                                                                                                                                                                                                                                                                                                                                                                                                                                                                                                                                                                                                                                                                                                                                                                                                                                                                                                                                                                                                                                                                                                                                                                                                                                                                                                                                                                                                                                                                                                                                                                                                                                                                                                                                                                      |                                                                                                                                                                    |
| <p><b>MBP-Synechocystis Z-ISO fusion version 3 (pMAL-c5X):</b></p> <p>ATGAAAATCGAAGAAGGTAAACTGGTAATCTGGATTAACGGCGATAAAGGCTATAACG<br/>GTCTCGCTGAAGTCGGTAAGAAATTCGAGAAAGATACCGGAATTAAAGTCACCGTTGA<br/>GCATCCGGATAAACTGGAAGAGAAATCCCACAGGTTGCGGCAACTGGCGATGGCCCT<br/>GACATTATCTTCTGGGCACACGACCGCTTTGGTGGCTACGCTCAATCTGGCCTGTTGG<br/>CTGAAATCACCCCGGACAAAGCGTTCCAGGACAAGCTGTATCCGTTTACCTGGGATGC<br/>CGTACGTTACAACGGCAAGCTGATTGCTTACCCGATCGCTGTTGAAGCGTTATCGCTG<br/>ATTTATAACAAAGATCTGCTGCCGAACCCGCCAAAAACCTGGGAAGAGATCCCGGCGC<br/>TGGATAAAGAATGAAAGCGAAAGGTAAGAGCGCGCTGATGTTCAACCTGCAAGAACC<br/>GTACTTCACTGGCCGCTGATTGCTGCTGACGGGGTTATGCGTTCAAGTATGAAAAAC<br/>GGCAAGTACGACATTAAAGACGTGGGCGTGGATAACGCTGGCGCGAAAGCGGGTCTGA<br/>CCTTCCTGGTTGACCTGATTAAAAAACAAACACATGAATGCAGACACCGATTACTCCAT<br/>CGCAGAAGCTGCCTTTAATAAAGGCGAAACAGCGATGACCATCAACGGCCCGTGGGCA<br/>TGGTCCAACATCGACACCAGCAAAGTGAATTATGGTGTAAACGGTACTGCCGACCTTCA<br/>AGGGTCAACCATCCAAACCGTTCGTTGGCGTGCTGAGCGCAGGTATTAACGCCGCCAG<br/>TCCGAACAAAGAGCTGGCAAAAGAGTTCTTCGAAAACCTATCTGCTGACTGATGAAGGT<br/>CTGGAAGCGGTTAATAAAGACAAACCGCTGGGTGCCGTAGCGCTGAAGTCTTACGAGG<br/>AAGAGTTGGCGAAAAGATCCACGTATTGCCGCCACCATGGAACCGCCAGAAAGGTGA<br/>AATCATGCCGAACATCCCGCAGATGTCCGCTTTCTGGTATGCCGTGCGTACTGCGGTG<br/>ATCAACGCCGCCAGCGGTGCTGACATGTCGATGAAGCCCTGAAAGACGCGCAGACTa<br/>attcgagctcgaacaacaacaacaataacaataacaacaacctcgggATCGAGGGAAG<br/>GatattcacatATGTTTGATATTTCTTCTCCTTGGCCCTGGTTGACCCCCAGCCATGGC<br/>ATTATCGCCGCTACCTTCTGTTGTTTGCCATCGTTTCATAGTGGCTTAGCCGCCCTGC<br/>GAGCCTGGGGGAAAGCAAAATTGGCGCTAGGGGCTATCGAGTTATATTTGCCCTGGT<br/>GAGTATTTCCCTGGCTACGGGATTAATTATTTATTTTCAACCATCGCTATGATGGT<br/>CTGCAACTCTGGCAAGTACAGGGAGTAACGGGAGTTAAACCCCTGGTGTGGATTTTGT<br/>CTGCCCTATCTTTTCTTCTCTTTTCCCGCCACTTTTAACCTGTTGGAAATTGCCGC<br/>TATCCAAAAACCGGAAATCCATCTTTATGAAACGGGCATTATCCGTATTTGTGCCCAT<br/>CCTCAAATGGTCCGTCAAGTAATTTGGTGCATTGCCCACACCCCTCTGGTTGGGAACCA<br/>CTTTTACTCTGGTTACCAGCTTGGGATTAATTGCCACCATTGCTTTGCAGTCTGGCA<br/>TGGCGATCGCCGTTGGCAACACAAATATGGCGAGGCTTTTCTAGCAGTGAAACAAAGA<br/>ACTTCCATCATTCCTTTCAAGCGATCTGGGAGGGAAGGCAAAATTCTAGTGTGGCAGG<br/>AATTTATCAAACAGCCTATGTGGGGTAATGGGTTTTCATTGCCCTACTATGGTGGGG<br/>CCATCCCTGGTTGATGGTGATGACCTCCAGAGTTAATTGGTAG</p> | <p>Construct encodes<br/>following protein:<br/>MBP-linker-<b>Factor</b><br/><b>Xa</b> cleavage site-<br/>linker-<b>Slr1599</b></p>                                |
| <p><b>MBP-Synechocystis Z-ISO fusion version 4 (pMAL-p5X):</b></p> <p>ATGAAAATAAAAACAGGTGCACGCATCCTCGCATTATCCGCATTAAACGACGATGATGT<br/>TTTCCGCCCTCGGCTCTCGCCAAAATCGAAGAAGGTAAACTGGTAATCTGGATTAACGG<br/>CGATAAAGGCTATAACGGTCTCGCTGAAGTCGGTAAGAAATTCGAGAAAGATACCGGA<br/>ATTAAGTCAACCGTTGAGCATCCGGATAAACTGGAAGAGAAATCCCACAGGTTGCGG<br/>CAACTGGCGATGGCCCTGACATTATCTTCTGGGCACACGACCGCTTTGGTGGCTACGC<br/>TCAATCTGGCCTGTTGGCTGAAATCACCCGGACAAAGCGTTCCAGGACAAGCTGTAT<br/>CCGTTTACCTGGGATGCCGTACGTTACAACGGCAAGCTGATTGCTTACCCGATCGCTG<br/>TTGAAGCGTTATCGCTGATTTATAACAAAGATCTGCTGCCGAACCCGCCAAAAACCTG<br/>GGAAGAGATCCCGGCGCTGGATAAAGAACTGAAAGCGAAAGGTAAGAGCGCGCTGATG<br/>TTCAACCTGCAAGAACCGTACTTCACCTGGCCGCTGATTGCTGCTGACGGGGTTATG<br/>CGTTCAAGTATGAAAACGGCAAGTACGACATTAAAGACGTGGGCGTGGATAACGCTGG<br/>CGCGAAAGCGGTCTGACCTTCTGTTGACCTGATTAAAAACAAACACATGAATGCA<br/>GACACCGATTACTCCATCGCAGAAGCTGCCTTTAATAAAGGCGAAACAGCGATGACCA<br/>TCAACGGCCCGTGGGCATGGTCCAACATCGACACCAGCAAAGTGAATTATGGTGTAAAC<br/>GGTACTGCCGACCTTCAAGGGTCAACCATCCAAACCGTTCTGTTGGCGTGCTGAGCGCA<br/>GGTATTAAACGCCGCCAGTCCGAACAAAGAGCTGGCAAAAGAGTTCTTCGAAAACCTATC</p>                                                                                                                                                                                                                                                                                                                                                                                                                                                                                                                                                                                                                                                                                                                                                                                                                                                                                                                                                                                                                                                                                          | <p>Constructs encodes<br/>following protein:<br/><b>MalE</b> signal<br/>sequence-MBP-<br/>linker-<b>Factor Xa</b><br/>cleavage site-linker-<br/><b>Slr1599</b></p> |

TGCTGACTGATGAAGGTCTGGAAGCGGTTAATAAAGACAAACCGCTGGGTGCCGTAGC  
GCTGAAGTCTTACGAGGAAGAGTTGGCGAAAGATCCACGTATTGCCGCCACCATGGAA  
AACGCCCAGAAAGGTGAAATCATGCCGAACATCCCGCAGATGTCCGCTTTCTGGTATG  
CCGTGCGTACTGCGGTGATCAACGCCGCCAGCGGTCGTCAGACTGTCGATGAAGCCCT  
GAAAGACGCGCAGACTaattcgagctcgaacaacaacaacaataacaataacaacaac  
ctcgggATCGAGGGAAGgatttcacatATGTTTGATATTTCTTCTCCTTGGCCCTGGT  
TGACCCCGAGCCATGGCATTATCGCCGCCTACCTTCTGTTGTTTGCCATCGTTCATAG  
TGGCTTAGCCGCCCTGCGAGCCTGGGGGAAAGCAAATTGGCGCTAGGGGCTATCGA  
GTTATATTTGCCCTGGTGAGTATTTCCCTGGCTACGGGATTAATTATTTATTTTTTCA  
ACCATCGCTATGATGGTCTGCAACTCTGGCAAGTACAGGGAGTAACGGGAGTTAAACC  
CCTGGTGTGGATTTTGTCTGCCCTATCTTTTTTCTTCCTTTTTTCCCGCCACTTTTAAC  
CTGTTGGAAATTGCCGCTATCCAAAACCGGAAATCCATCTTTATGAAACGGGCATTA  
TCCGTATTTGTGCCCATCCTCAAATGGTCGGTCAAGTAATTTGGTGCAATTGCCACAC  
CCTCTGGTTGGGAACCACTTTTACTCTGGTTACCAGCTTGGGATTAATTGCCACCAT  
TGCTTTGCAGTCTGGCATGGCGATCGCCGTTGGCAACACAAATATGGCGAGGCTTTTC  
TAGCAGTGAAACAAAGAACTTCCATCATTCCCTTTCAAGCGATCTGGGAGGGAAGGCA  
AATTCTAGTGTGGCAGGAATTTATCAAACCAGCCTATGTGGGGTAATGGGTTTCATT  
GCCCTACTATGGTGGGGCCATCCCTGGTTGATGGTGATGACCTCCAGAGTTAATTGGT  
AG



**Table S4. ROSETTA membrane protein scores for abolishment of putative H150 binding site in *Zea mays* Z-ISO.**

| Mutation  | ROSETTA score | Mutation  | ROSETTA score |
|-----------|---------------|-----------|---------------|
| WT        | -760.705      | Arg296Trp | -663.212      |
| Arg170Ala | -762.904      | Arg296Phe | -732.487      |
| Arg170Trp | -755.944      | Gln255Ala | -766.112      |
| Arg170Phe | -642.435      | Gln255Trp | -756.624      |
| Arg296Ala | -758.187      | Gln255Phe | -759.713      |

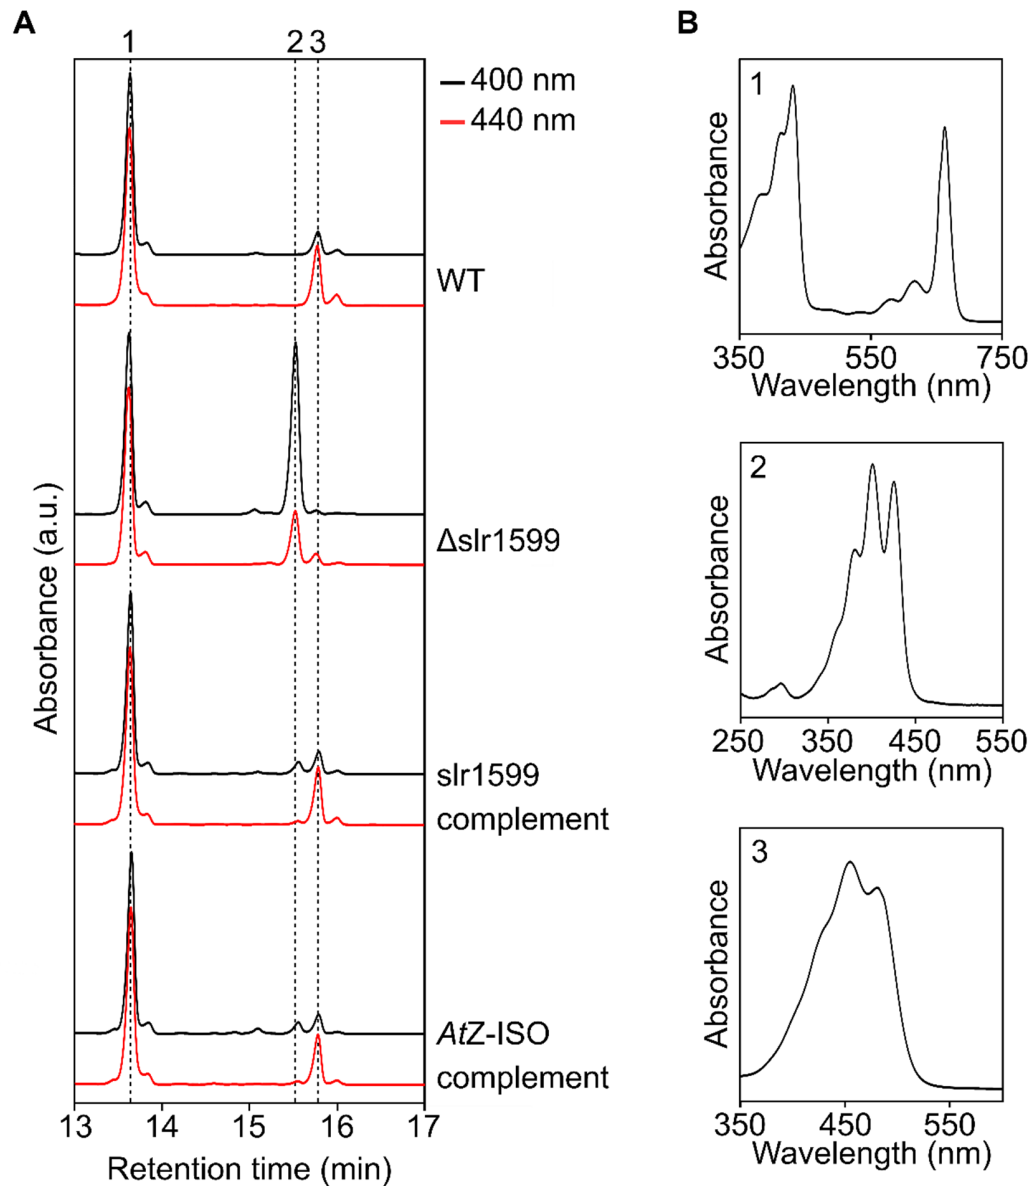

**Figure S1. Complementation of the *Synechocystis*  $\Delta$ slr1599 mutant.** **(A)** Pigments were extracted from WT,  $\Delta$ slr1599 and  $\Delta$ slr1599 with slr1599 or the *Arabidopsis* Z-ISO (AtZ-ISO) genes inserted into the *psbAII* locus (slr1599 complement and AtZ-ISO complement, respectively) and separated by RP-HPLC. Eluted pigments were detected by monitoring absorbance at 400 nm (black trace) and 440 nm (red trace). Peak heights were normalized to the Chl peak (peak 1). Dotted lines and numbers correspond to numbers in **(B)**. **(B)** Eluted pigments in **(A)** were identified by their absorbance spectra. Numbers correspond to equivalent numbered peaks highlighted by dotted lines in **(A)**. Peak 1 = chl *a*; peak 2 = 9,15,9'-tri-*cis*- $\zeta$ -carotene; peak 3 =  $\beta$ -carotene.

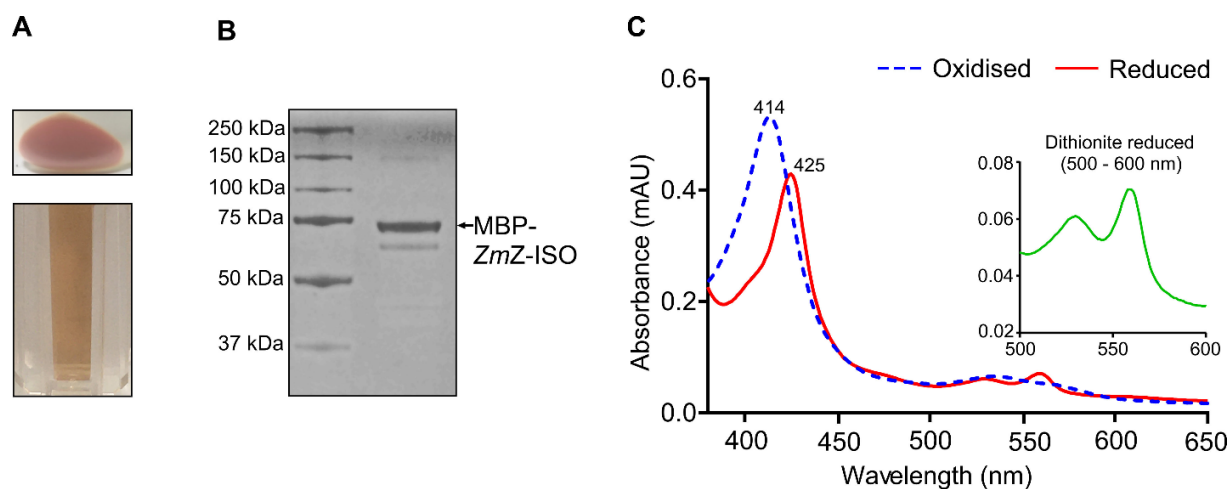

**Figure S2. Purification of the *Zea mays* (Zm) MBP-Z-ISO fusion protein. (A)** Cell pellets (top) and solubilized membrane fractions (bottom) of MBP-ZmZ-ISO heterologously produced in *E. coli*. **(B)** SDS-PAGE analysis of purified MBP-ZmZ-ISO. **(C)** Oxidized and reduced spectra of the MBP-ZmZ-ISO protein with spectral changes in the 500-600 nm region following sodium dithionite reduction highlighted in the inset panel.

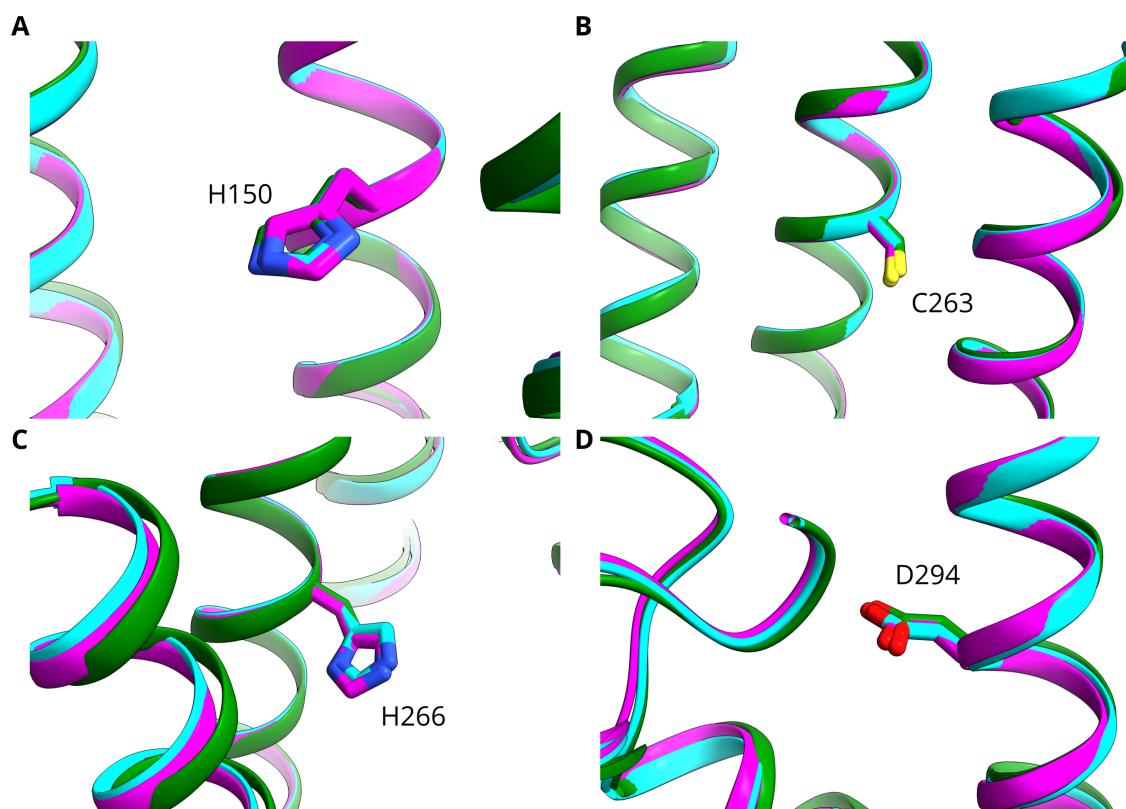

**Figure S3. Orientation of conserved Z-ISO residues with putative catalytic activity.** Z-ISO model structures from *Synechocystis* (green), *Arabidopsis* (cyan) and maize (magenta) are shown, with atomic coordinates of previously-proposed heme binding residues – His 150 (A) and His 266 (C) – and residues with catalytic activity – Cys 263 (B) and Asp 294 (D) – displayed as sticks (oxygen, red; nitrogen, blue; sulfur, yellow).

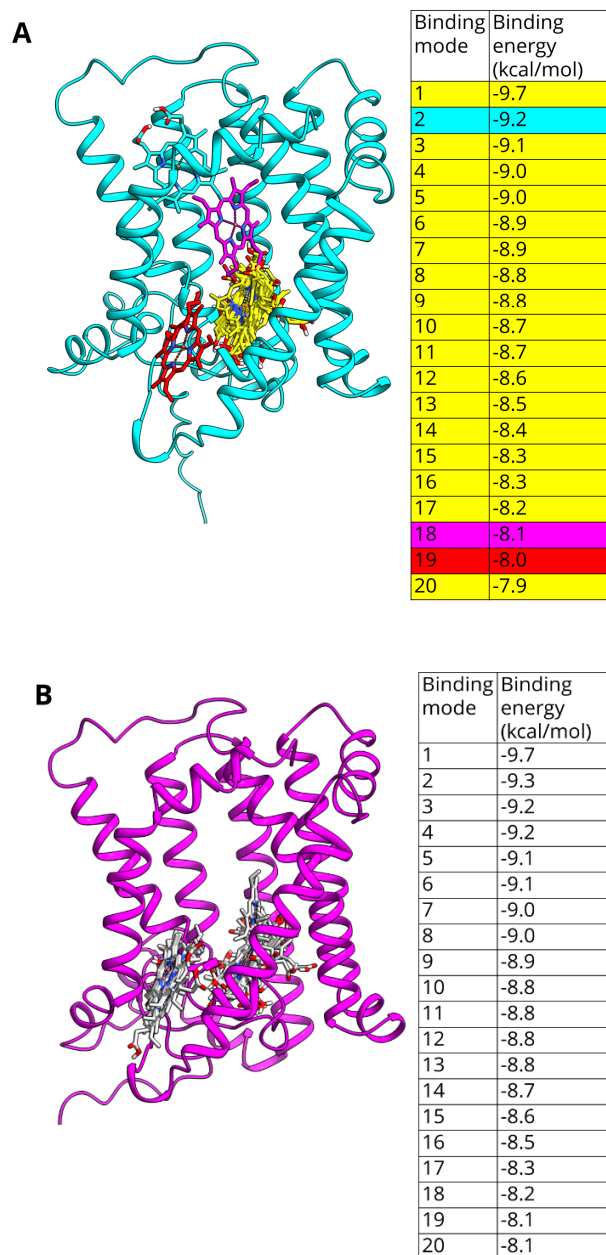

**Figure S4. Heme B docking in *Arabidopsis* (A) and maize (B) Z-ISO using Autodock Vina.** Model protein structures (ribbon) are shown with the heme B cofactor (sticks) positioned in all 20 geometries identified in the docking simulation. The color of the cofactor in (A) corresponds to the color of the cell for the tabulated predicted binding energy estimate displayed in the inset table.

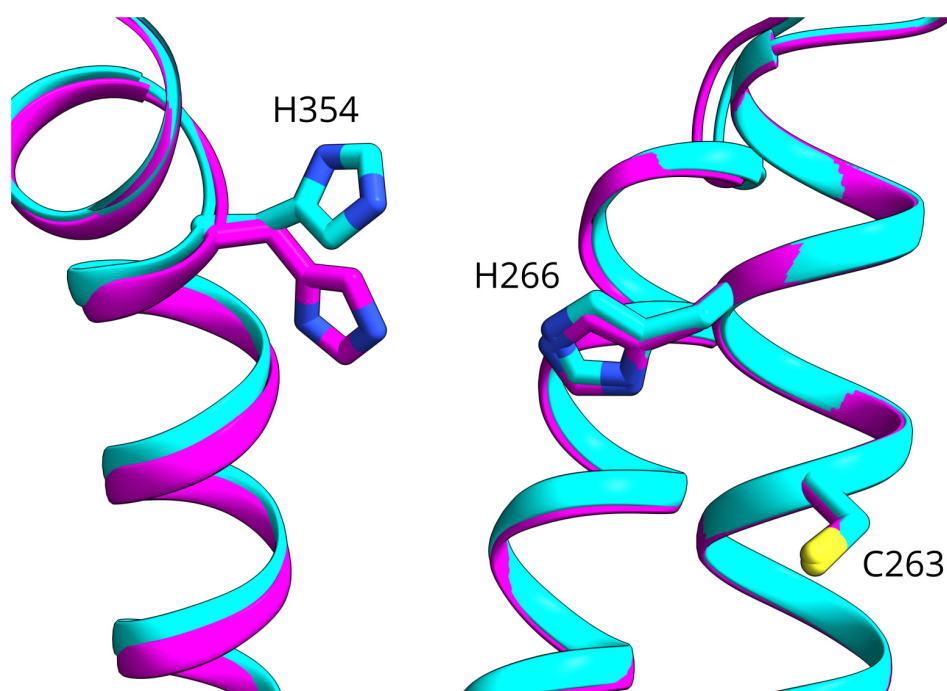

**Figure S5. Alignment of H266 and H354, relative to C263, in maize (magenta) and *Arabidopsis* (cyan) Z-ISO. Key residues displayed as sticks (nitrogen, blue; sulfur, yellow).**

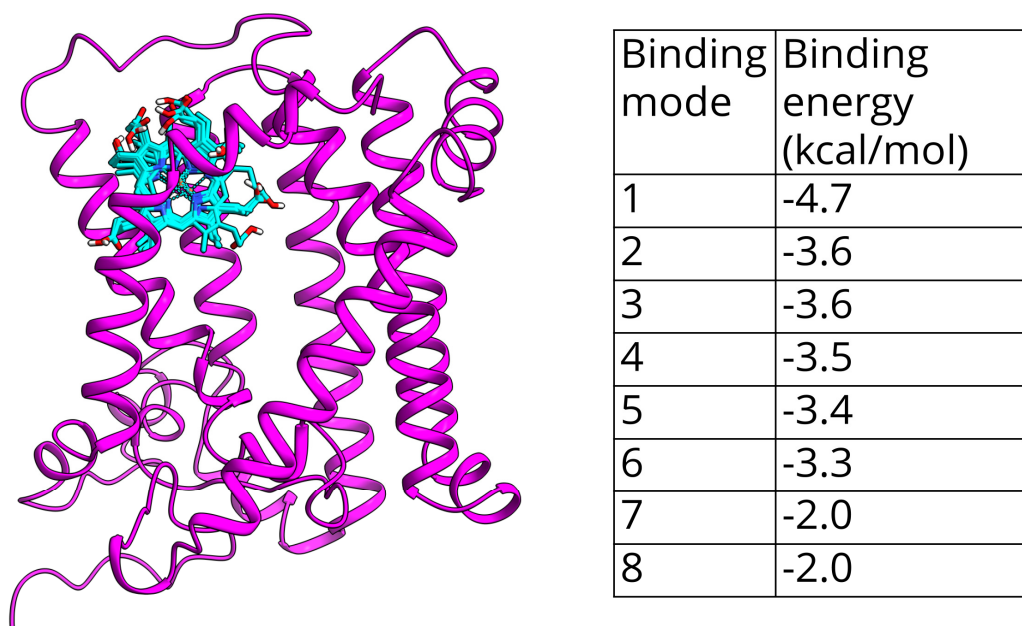

**Figure S6. Heme docking at the H266/H354 site in maize Z-ISO.** Corresponding predicted binding energy values for each heme binding mode are displayed in the table inset (protein, purple; heme-carbon, cyan; oxygen, red; nitrogen, blue; hydrogen, white).

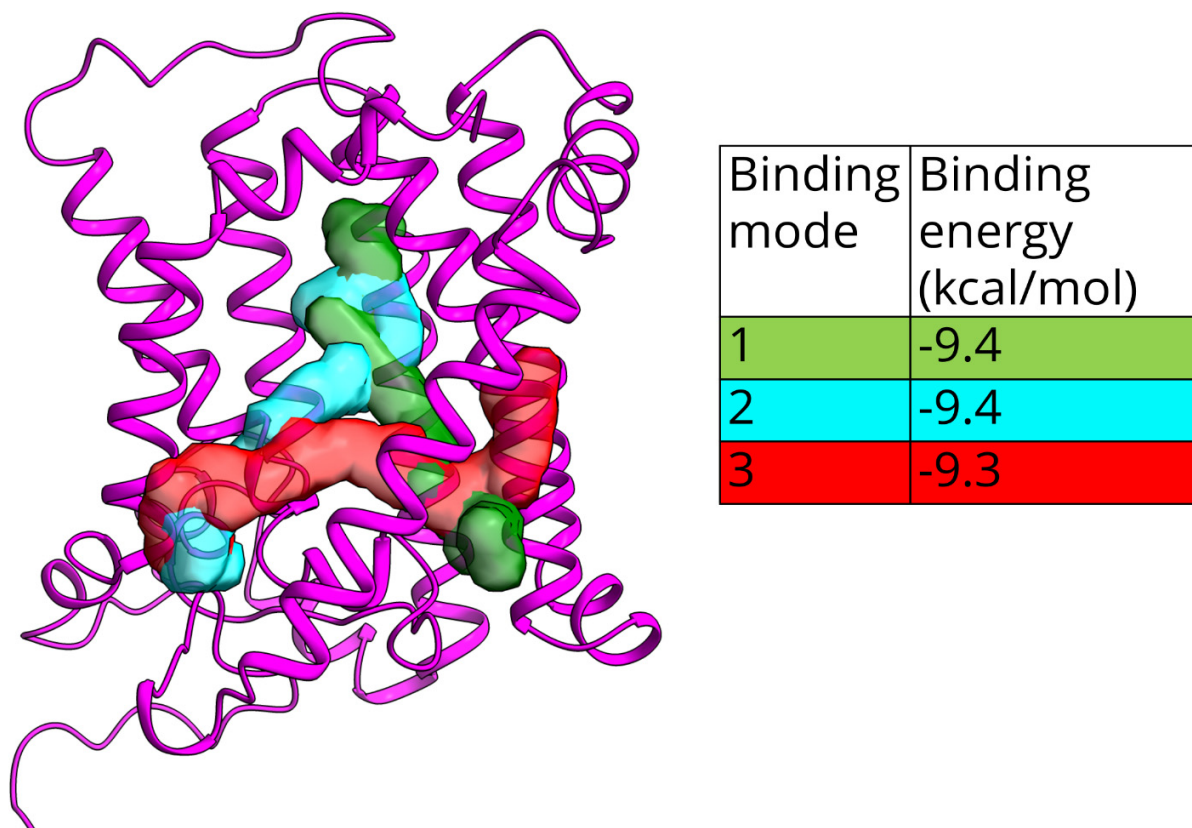

**Figure S7. Docking 9,15,9'-tri-*cis*- $\zeta$ -carotene into the maize Z-ISO-heme B model.** The corresponding predicted binding energy values for each carotenoid binding mode are displayed in the inset table. The color of the carotenoid density corresponds to the color of the cell in the table.



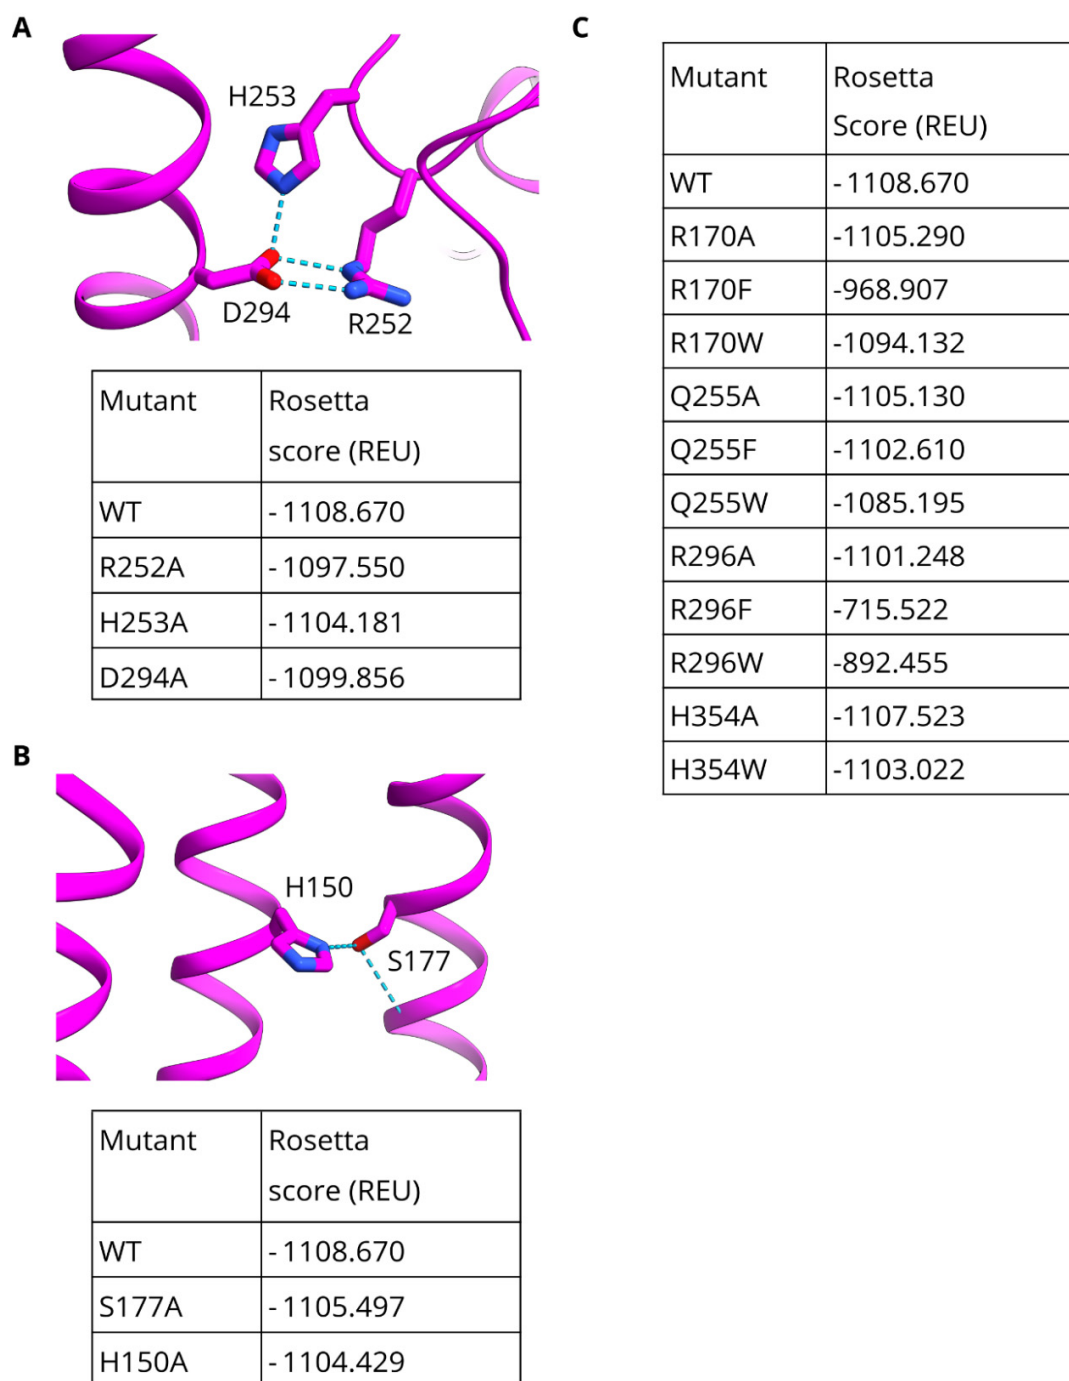

**Figure S8. Using the Rosetta score function to estimate free-energy changes of point mutations.** Predicted hydrogen-bonds between residues proximal to D294 (A) and H150 (B) are shown as dashed lines. Note that only side chain residues are rendered as sticks, backbone hydrogen-bond donors are not visualized. Estimated free-energy changes for point mutations around residues H253 (A, C), H150 (B, C) are displayed in the tables in Rosetta energy units (REU).
